# Supplementary material
Source: MDPI journal article supplement (https://www.mdpi.com/2073-4395/11/11/2358)
Supplement: s1 [file s1]

Table S1 The control settings in microwave digestion system

| Steps | Temperature / °C | Heating up time/ min | Holding time/ min | Setting pressure (PSI) |
|-------|------------------|----------------------|-------------------|------------------------|
| 1     | 130              | 10                   | 2                 | 400                    |
| 2     | 150              | 3                    | 2                 |                        |
| 3     | 180              | 3                    | 15                |                        |
